# Supplementary material
Source: PubMed Central journal article supplement (PMC5701663)
Supplement: NIHMS894386-supplement-1.pdf [file NIHMS894386-supplement-1.pdf]

## Supplementary Information for

# Klebsazolicin inhibits 70S ribosome by obstruction of the peptide exit tunnel

Mikhail Metelev<sup>1,2,3,4,\*</sup>, Ilya A. Osterman<sup>3,5,\*</sup>, Dmitry Ghilarov<sup>3,4</sup>, Nelli F. Khabibullina<sup>6</sup>, Alexander Yakimov<sup>1,7</sup>, Konstantin Shabalin<sup>7</sup>, Irina Utkina<sup>1,3</sup>, Dmitry Y. Travin<sup>8</sup>, Ekaterina S. Komarova<sup>8</sup>, Marina Serebryakova<sup>4,5</sup>, Tatyana Artamonova<sup>1</sup>, Mikhail Khodorkovskii<sup>1</sup>, Andrey L. Konevega<sup>1,7</sup>, Petr V. Sergiev<sup>3,5</sup>, Konstantin Severinov<sup>1,3,4,9,†</sup>, and Yury S. Polikanov<sup>6,10,†</sup>

<sup>1</sup> Research Center of Nanobiotechnologies, Peter the Great St.Petersburg Polytechnic University, Saint-Petersburg, 195251, Russia

<sup>2</sup> Institute of Antimicrobial Chemotherapy, Smolensk State Medical Academy, Smolensk, 214018, Russia

<sup>3</sup> Skolkovo Institute of Science and Technology, Moscow, 143025, Russia

<sup>4</sup> Institute of Gene Biology of the Russian Academy of Sciences, Moscow, 119334, Russia

<sup>5</sup> Lomonosov Moscow State University, Department of Chemistry and A.N. Belozersky Institute of Physico-Chemical Biology, Moscow, 119992, Russia

<sup>6</sup> Department of Biological Sciences, University of Illinois at Chicago, Chicago, IL 60607, USA

<sup>7</sup> Petersburg Nuclear Physics Institute, NRC “Kurchatov Institute”, Gatchina, 188300, Russia

<sup>8</sup> Lomonosov Moscow State University, Department of Bioengineering and Bioinformatics, Moscow, 119992, Russia

<sup>9</sup> Waksman Institute for Microbiology, Rutgers, The State University of New Jersey, Piscataway, NJ 08854, USA

<sup>10</sup> Department of Medicinal Chemistry and Pharmacognosy, University of Illinois at Chicago, Chicago, IL 60607, USA

\* Authors contributed equally to this work

† To whom correspondence should be addressed.

E-mail: [yuryp@uic.edu](mailto:yuryp@uic.edu) (Y.S.P.)

[severik@waksman.rutgers.edu](mailto:severik@waksman.rutgers.edu) (K.S.)

### This file includes:

- I. Supplementary Figures (1 to 11 with legends)
- II. Supplementary Movie 1
- III. Supplementary Dataset 1
- IV. Supplementary Tables (1 to 4)
- V. Supplementary References

## SUPPLEMENTARY RESULTS

## I. SUPPLEMENTARY FIGURES

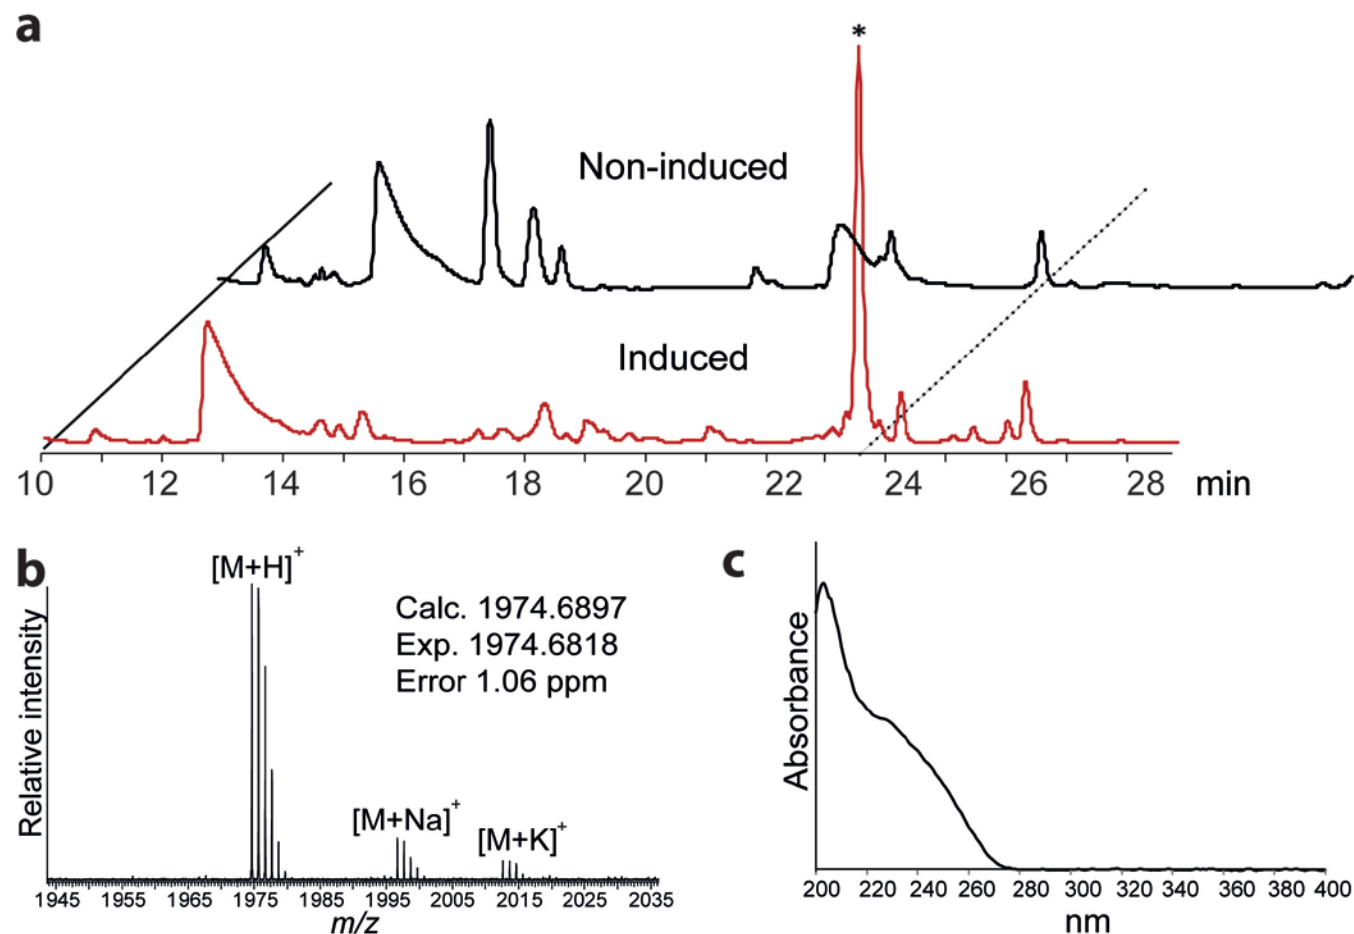

**Supplementary Figure 1 | Production of klebsazolicin by *E. coli* host.** (a) Comparison of HPLC-UV traces of supernatants of non-induced (black) and induced (red) cultures of *E. coli* cells carrying the *klpABCDE* gene cluster. KLB-containing fraction is labeled by an asterisk. (b) FT-MS spectra of HPLC-purified KLB. The  $m/z$  values of major peak  $[M+H]^+$  as well as  $[M+Na]^+$  and  $[M+K]^+$  are indicated. Experimentally measured and calculated values of  $m/z$   $[M+H]^+$  are indicated. (c) UV-Vis absorption spectrum of HPLC-purified KLB. Note that KLB displays absorbance that is characteristic forazole-containing peptides.

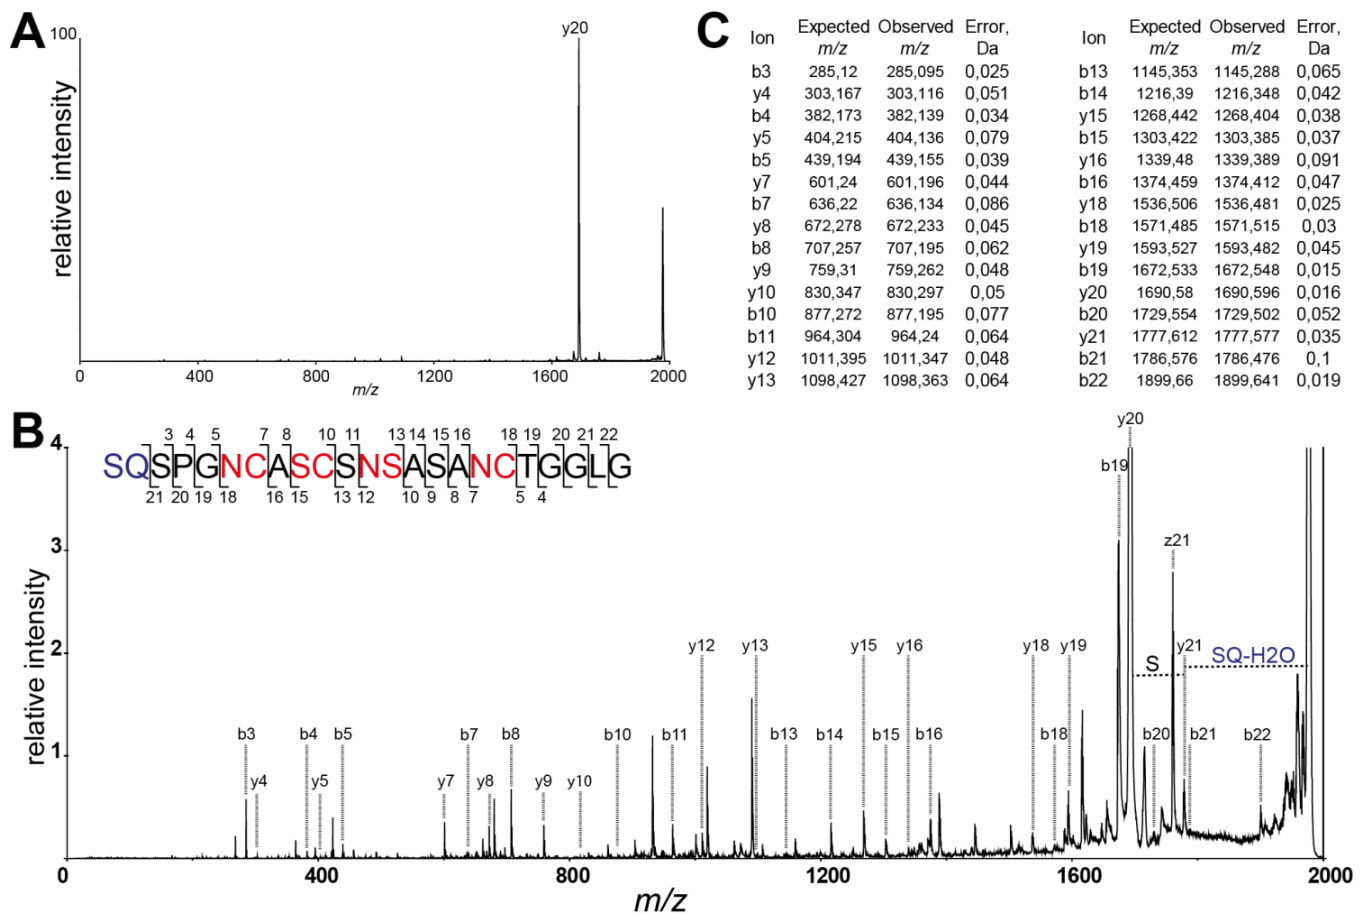

**Supplementary Figure 2 | MS/MS fragmentation analysis of klebsazolicin.** (a) MALDI-TOF-MS analysis of purified KLB resulted in identification of ion consistent with the calculated *m/z* of KLB. The ion was fragmented and produced represented spectrum with the predominant fragmentation between Ser3 and Pro4. (b) Zoomed MS-MS spectrum and the diagram of KLB with the observed *b*- and *y*-ions labeled in the structure and in the spectra. (c) Expected *m/z*, observed *m/z*, and error are shown for *b*- and *y*-ions present in the spectrum.

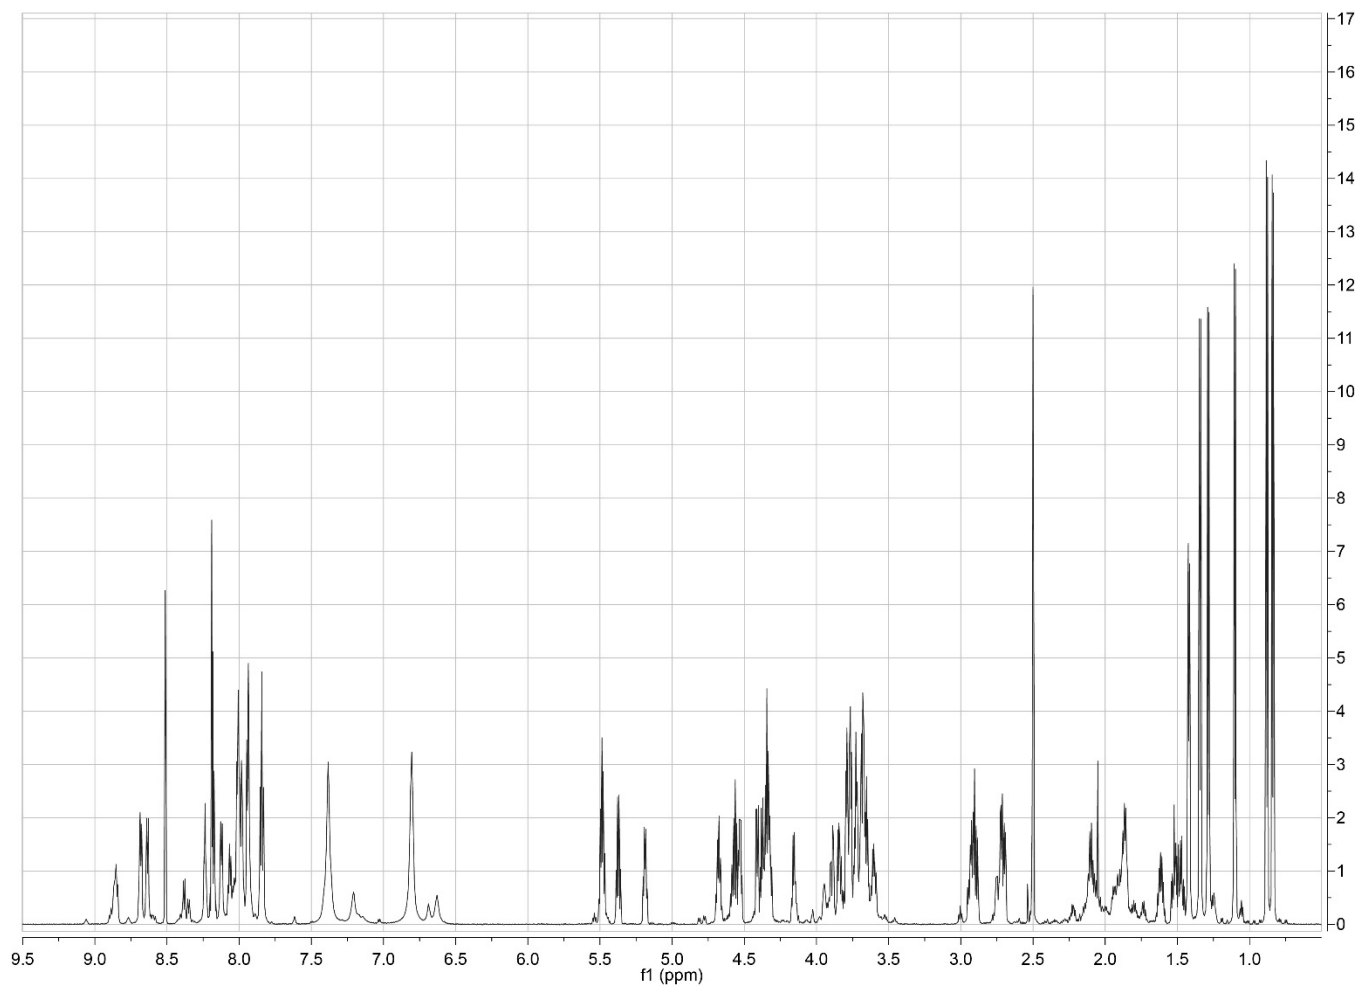

**Supplementary Figure 3a | 1H spectrum of klebsazolicin in DMSO-d6 solvent.**

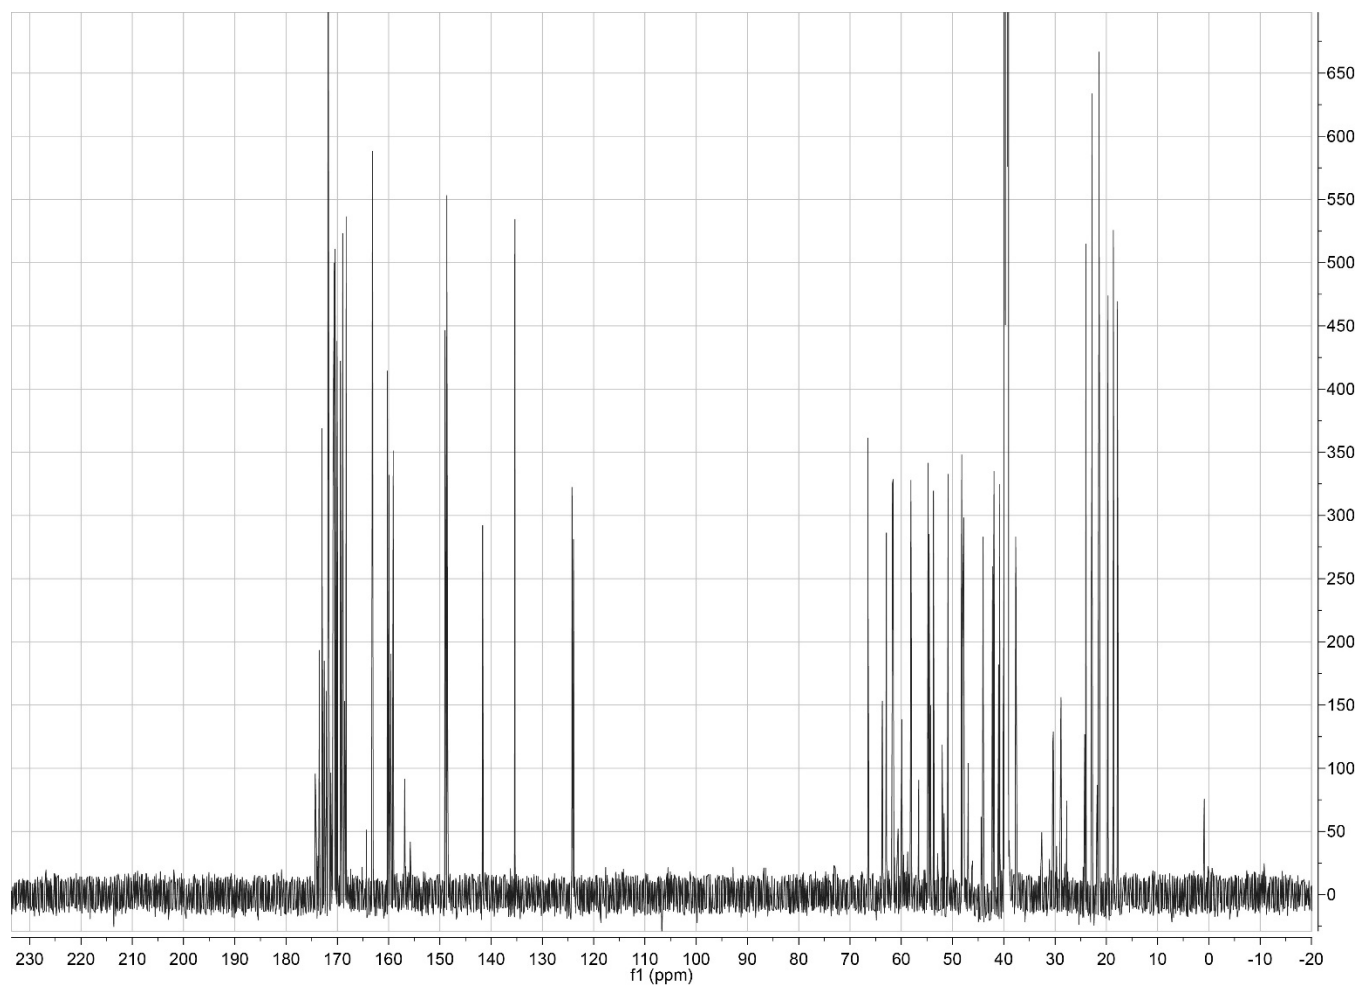

**Supplementary Figure 3b | <sup>13</sup>C spectrum of klebsazolicin in DMSO-d<sub>6</sub> solvent.**

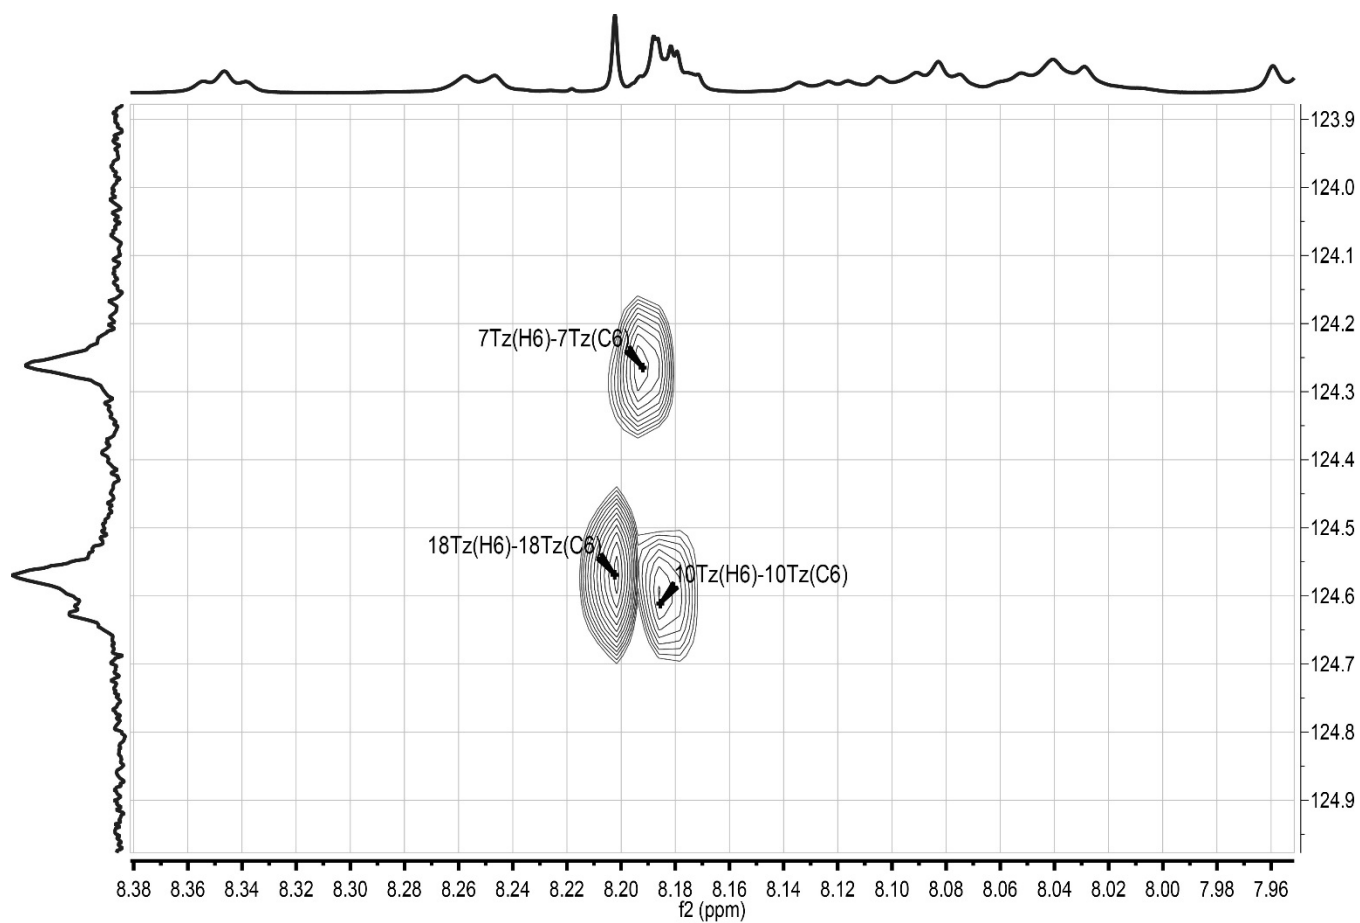

**Supplementary Figure 3c | Fragments of the <sup>13</sup>C-HSQC spectrum with assignments of thiazoles.**

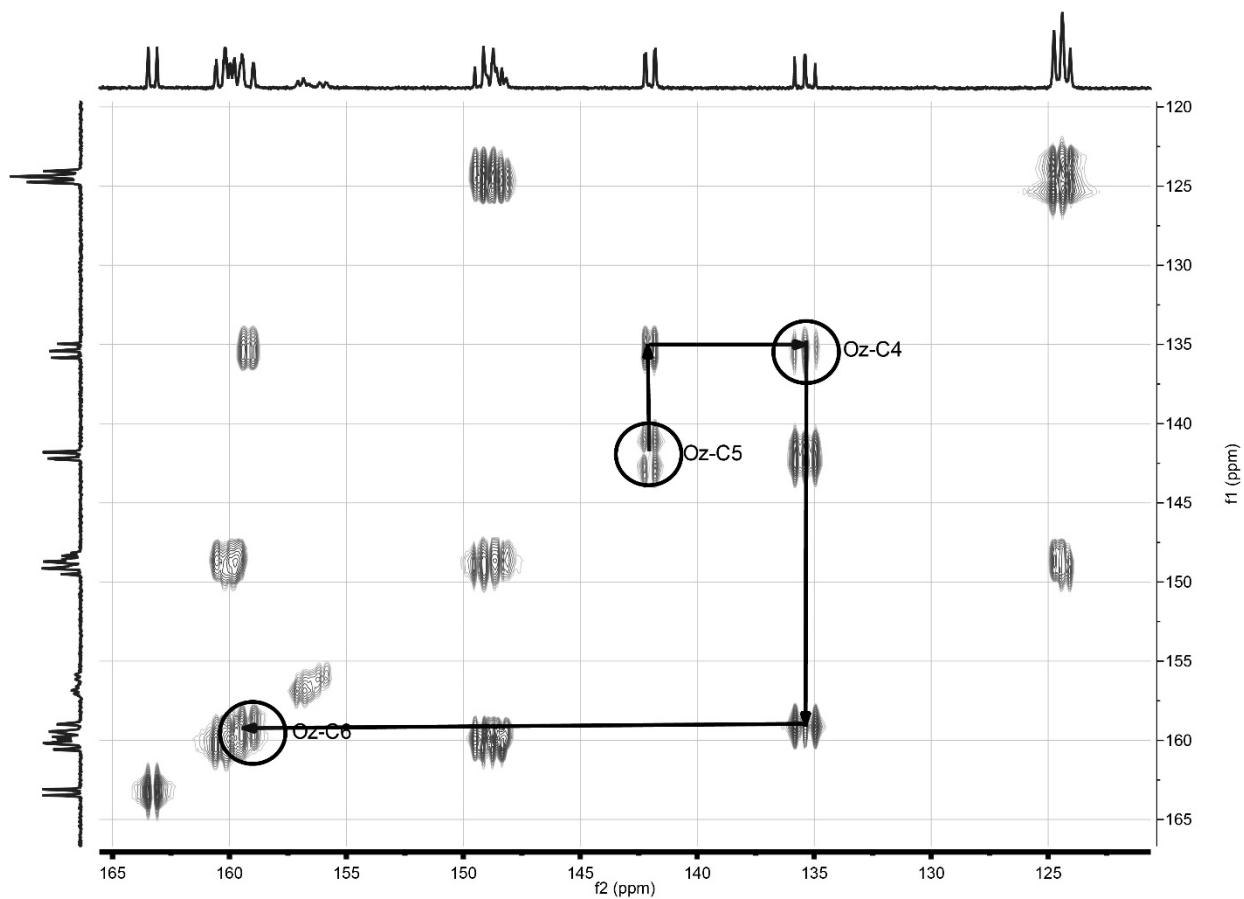

**Supplementary Figure 3d | Fragments of the <sup>13</sup>C-COSY spectrum with assignment of oxazole.**

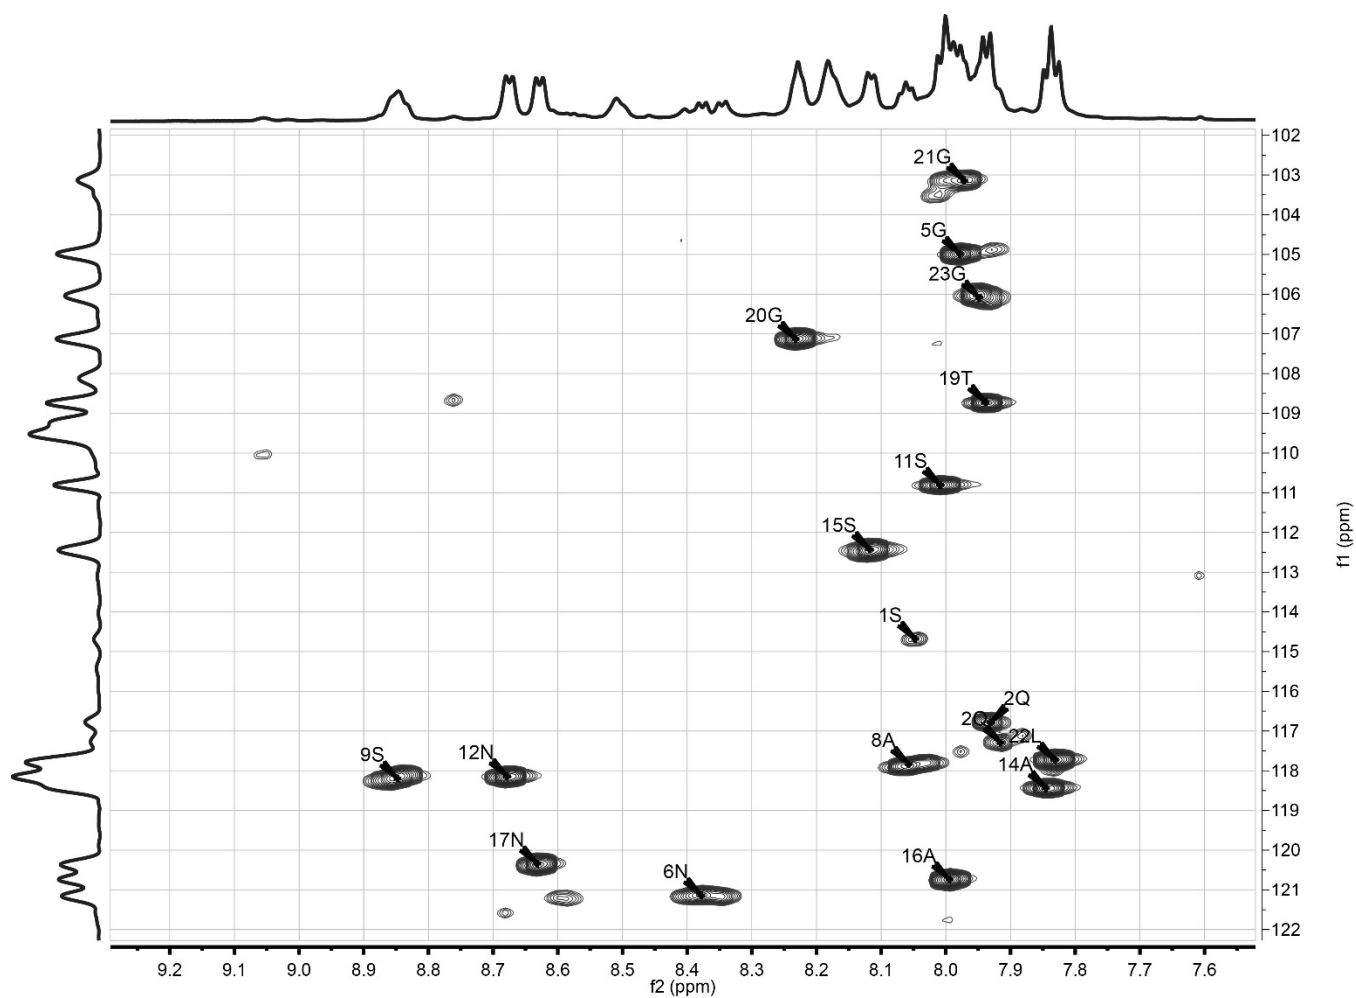

**Supplementary Figure 3e | Amide region of the <sup>1</sup>H-<sup>15</sup>N HSQC spectra of KLB.**



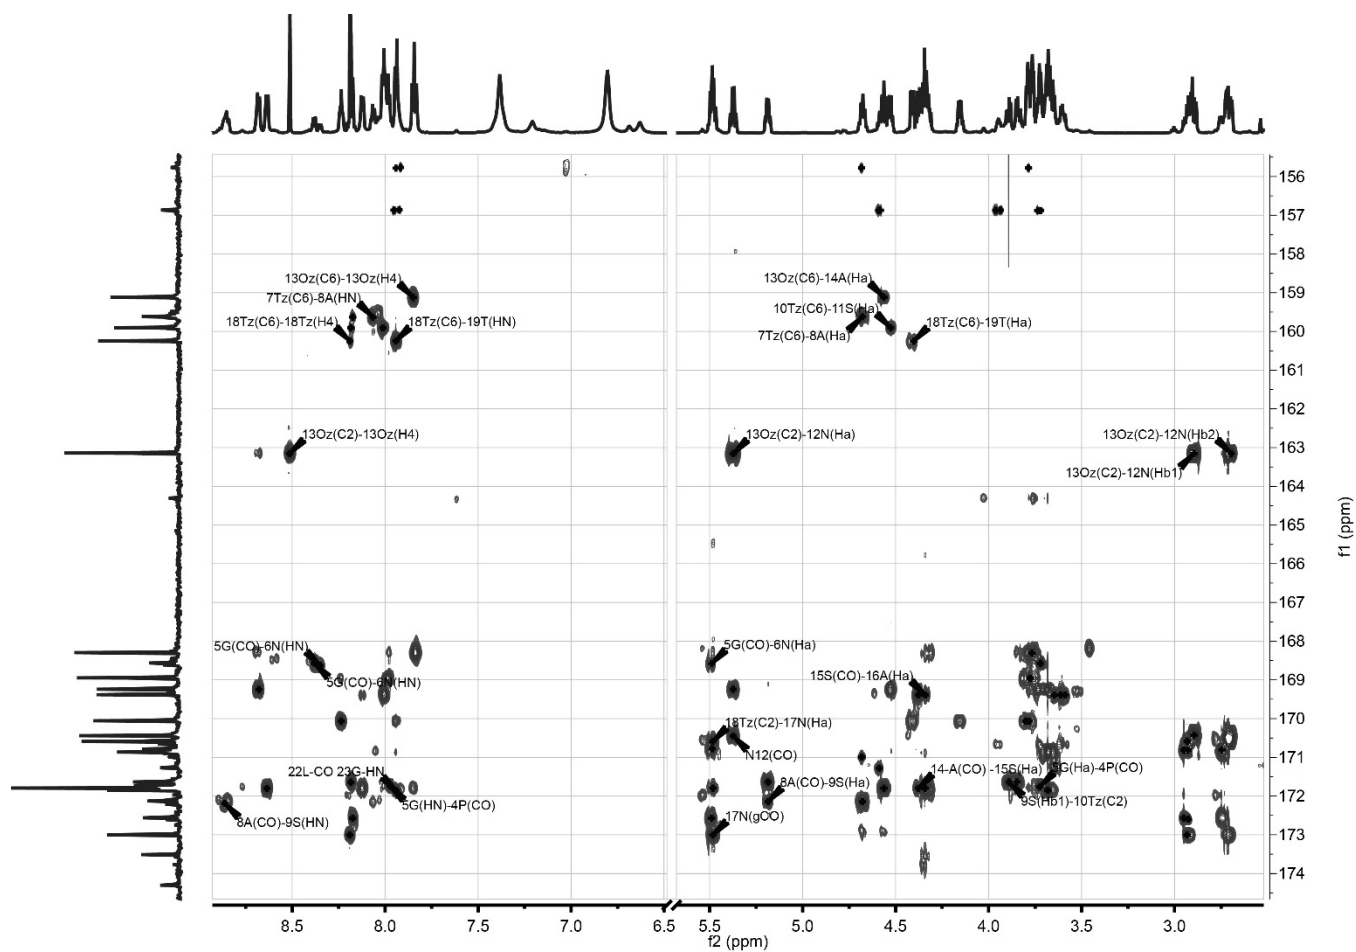

Supplementary Figure 3f | Fragments of the 13C-HMBC spectrum.

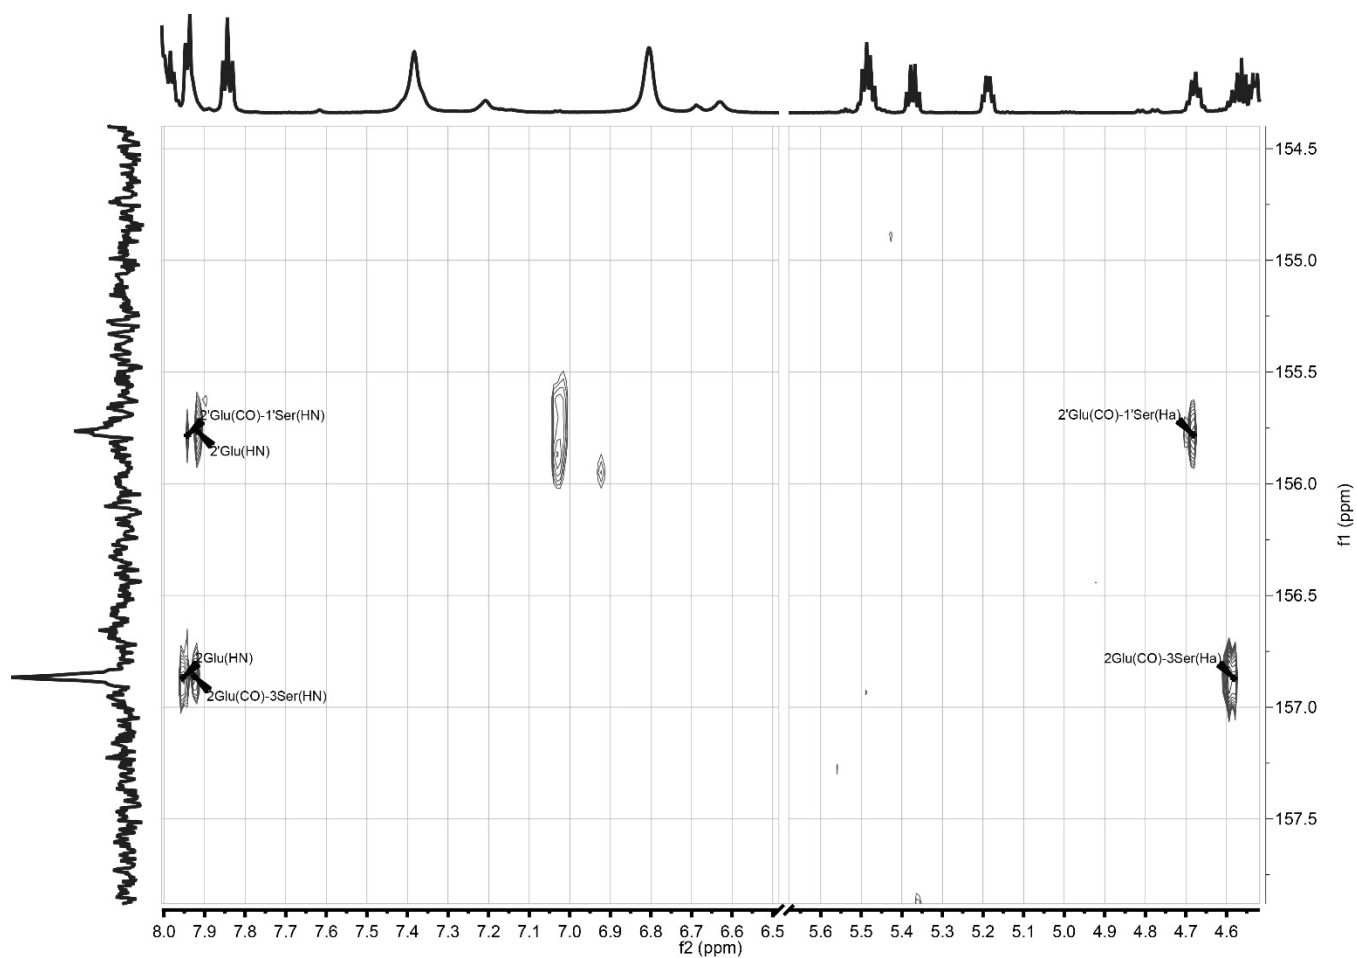

Supplementary Figure 3g | Fragments of the 13C-HMBC spectrum (Ser1, Glu2 and Ser3).

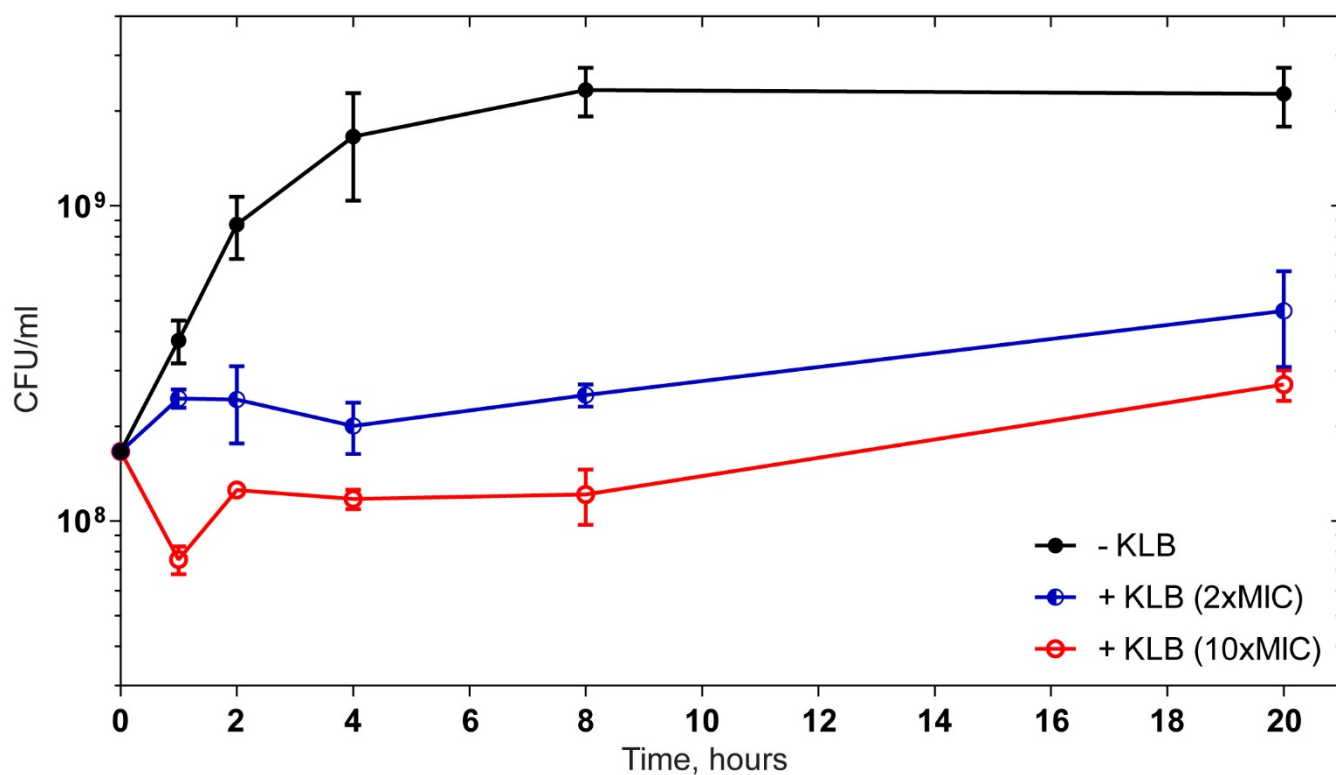

**Supplementary Figure 4 | Klebsazolicin displays bacteriostatic activity.** Exponentially growing cultures of *E. coli* B cells were exposed to 0, 2-fold MIC (4 $\mu$ M), and 10-fold MIC (20  $\mu$ M) KLB. Cells were grown in M9 medium supplemented with 0.4% glucose. The numbers of survived cells were determined by plating on solid LB plates. Each point represent average of three experiments for each culture, error bars indicate standard deviations.

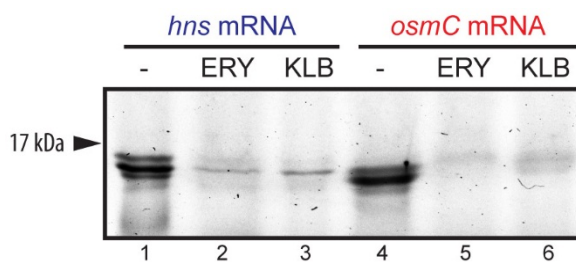

**Supplementary Figure 5 | Inhibition of full-length product accumulation on *hns* and *osmC* mRNAs by erythromycin (ERY) and klebsazolicin (KLB).** *hns* and *osmC* mRNAs were obtained by transcription with T7 RNA-polymerase, and then used for *in vitro* translation in S30 *E. coli* extract in the presence of fluorescently labeled lysine. The products were separated by SDS-PAGE and visualized by Typhoon FLA 9500. The concentrations of erythromycin and klebsazolicin both were 5  $\mu$ M.

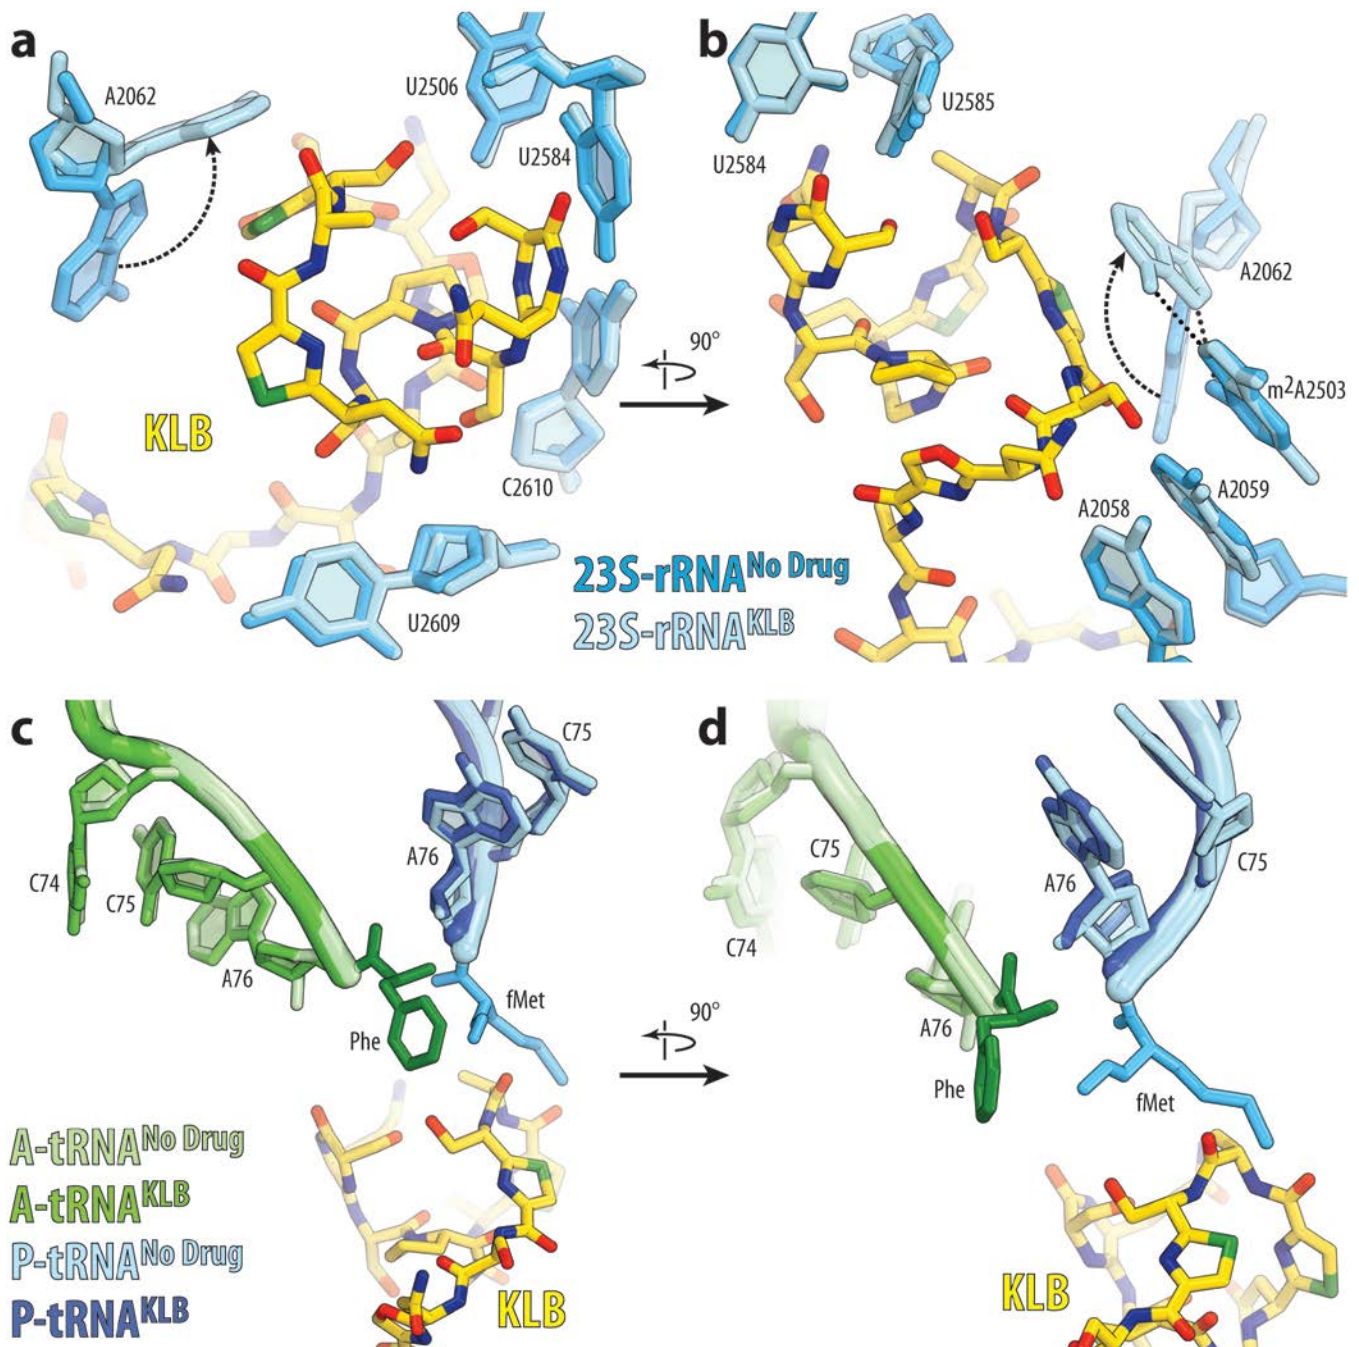

**Supplementary Figure 6 | Effects of KLB binding on the conformations of the nucleotides in the 23S rRNA. (a, b)** Comparison of the positions of key nucleotides in the 23S rRNA around the PTC in the presence of KLB (light blue) and in the canonical pre-attack state (blue) without the drug viewed from two different orientations. The structure coordinates for the position of the aminoacylated tRNAs in the pre-attack state are from the PDB entry 1VY4<sup>1</sup>. Note that the only nucleotide in the 23S rRNA whose conformation significantly changes upon binding of KLB is A2602, which rotates by more than ninety degrees to form Hoogsteen base-pair with the m<sup>2</sup>A2503. **(c, d)** Comparison of the positions of the CCA-

ends of the A- and P-site tRNAs in the presence of KLB (green and dark blue, respectively) and its absence with the canonical positions of the aminoacylated tRNAs. For reference, the fully accommodated tRNA in the A site (light green with the Phe moiety shown in dark green) and the P-site tRNA (light blue with the fMet moiety colored in blue) are shown from two different views. The structure coordinates for the position of the aminoacylated tRNAs in the pre-attack state are from the PDB entry 1VY4<sup>1</sup>. Note that presence of KLB does not affect positioning of the CCA-ends of the tRNAs in the PTC.

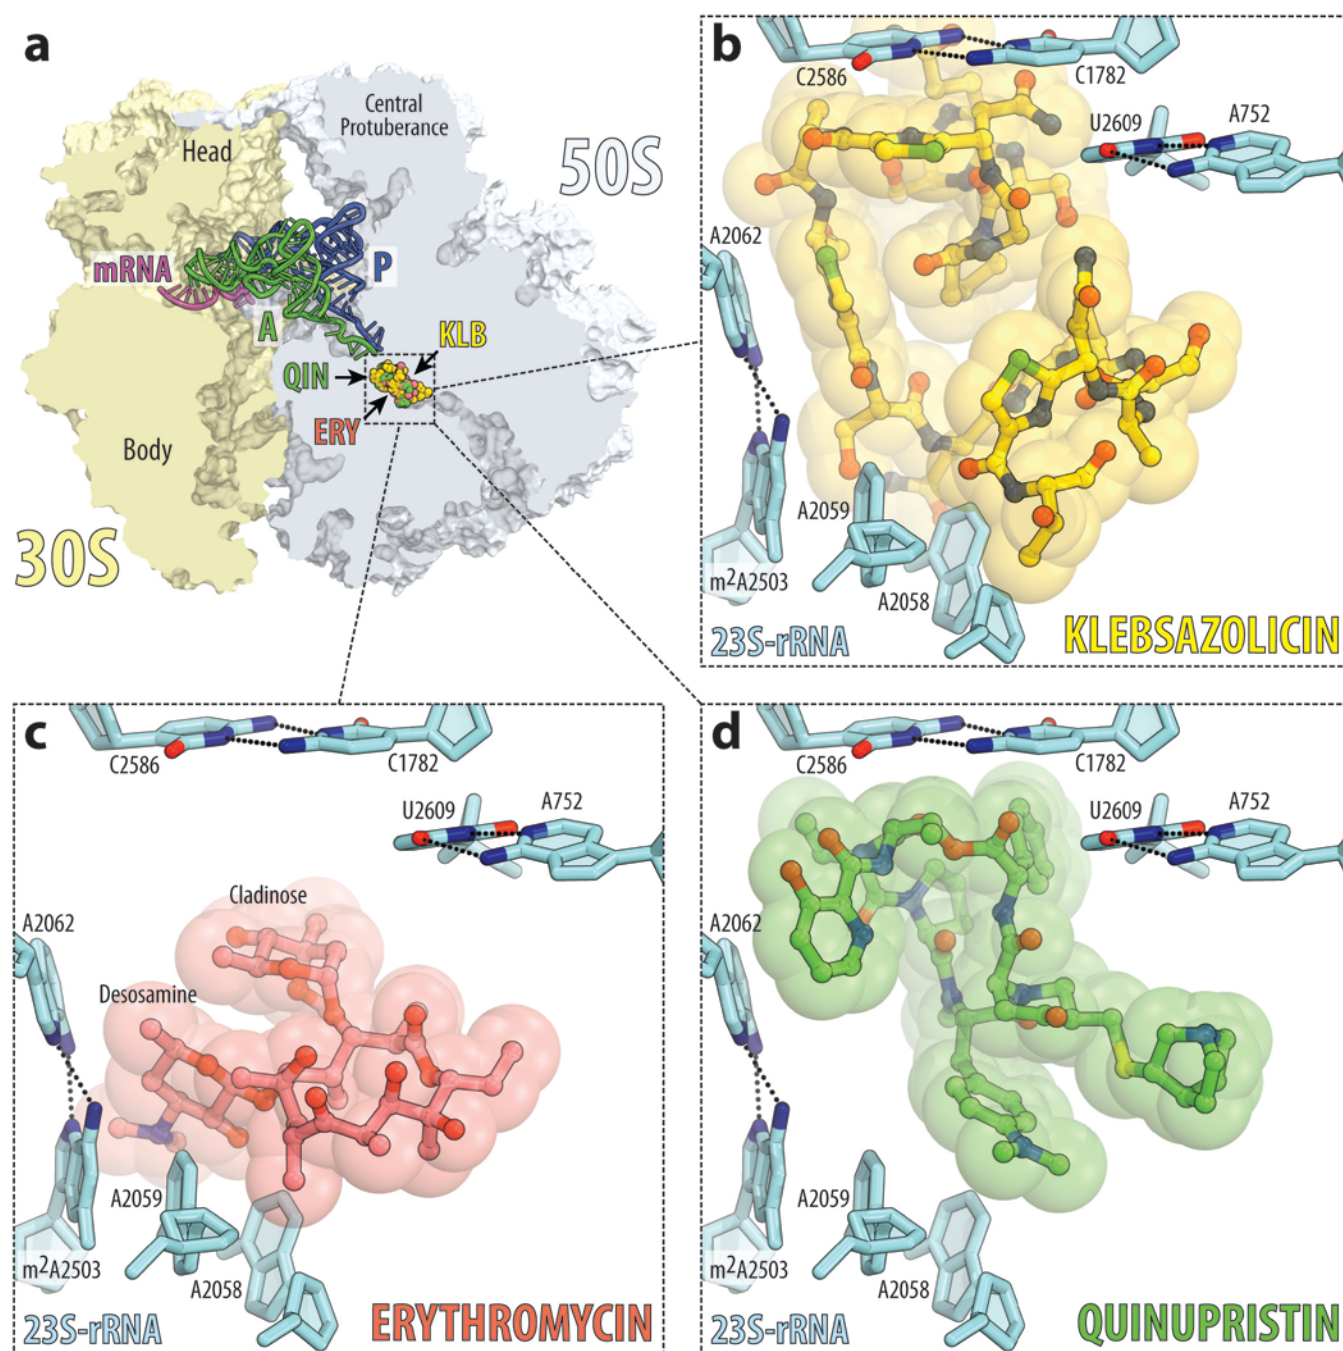

**Supplementary Figure 7 | Comparison of the binding sites of antibiotics in the peptidyl transferase center.** (a) Overview of the superimposed binding sites of klebsazolicin (KLB, yellow), erythromycin (ERY, light red), and quinupristin (QIN, green) in the PTC of the 50S subunit. The view and the coloring of 23S rRNA, mRNA and tRNAs are the same as in Fig. 4. KLB structure is from the current work, ERY is from PDB entry 4V7X<sup>2</sup>, and QIN is from PDB entry 4U26<sup>3</sup>. All structures were aligned based on the domain V of the 23S rRNA. (b, c, d) Close-up views of the binding sites shown in (a) for KLB, ERY, and

QIN respectively. Note that macrolides (ERY) or streptogramins B (QIN) only partially occlude the peptide exit tunnel, whereas klebsazolicin (KLB) significantly obstructs it.



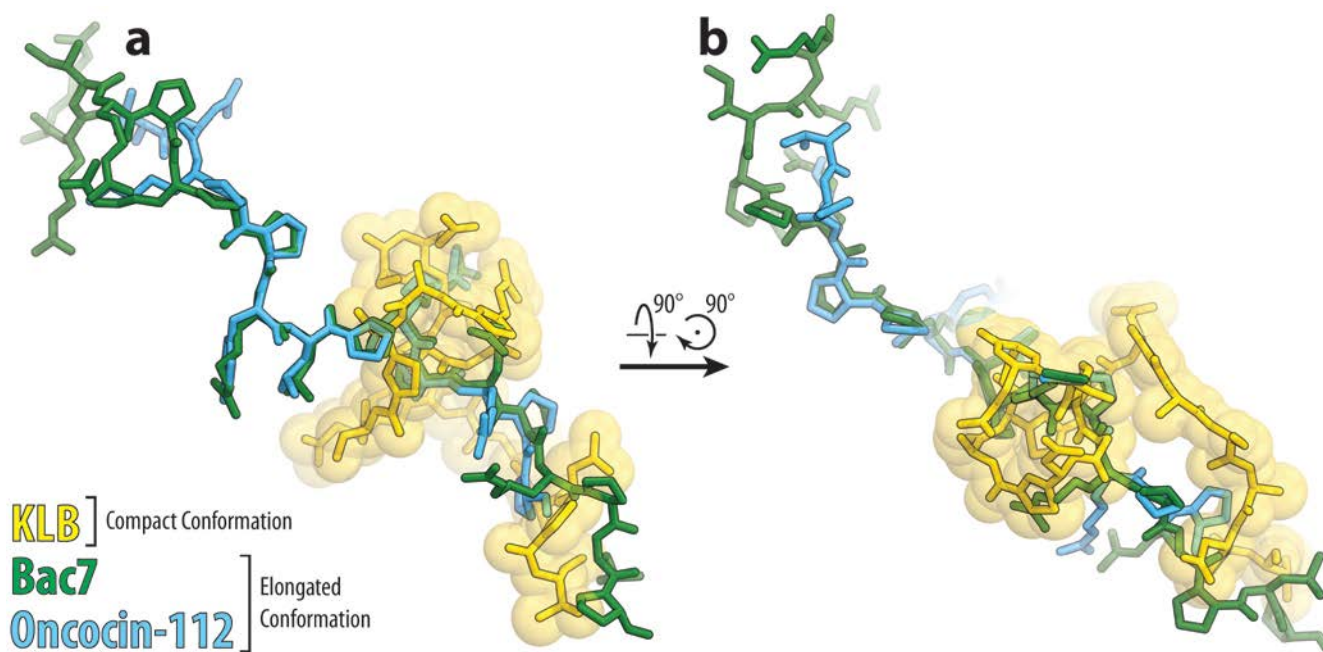

**Supplementary Figure 8 | Superposition of 70S-KLB structure with the ribosome-bound translation inhibitor peptides Oncocin and Bac7.** (a, b) Close-up views of the structure of KLB (yellow) in complex with the *T. thermophilus* 70S ribosome superimposed with the structure of ribosome-bound Bac7 peptide (green) (PDB entry 5HAU<sup>4</sup>) and Oncocin-112 peptide (PDB entry 4Z8C<sup>5</sup>). Superposition is based on the alignment of the 23S rRNA. Subunits of the 70S ribosome, mRNA and tRNAs are omitted for clarity). Note that Bac7 and Oncocin bind to the ribosomal peptide exit tunnel in the elongated conformation, while KLB binds in a compact globular conformation.

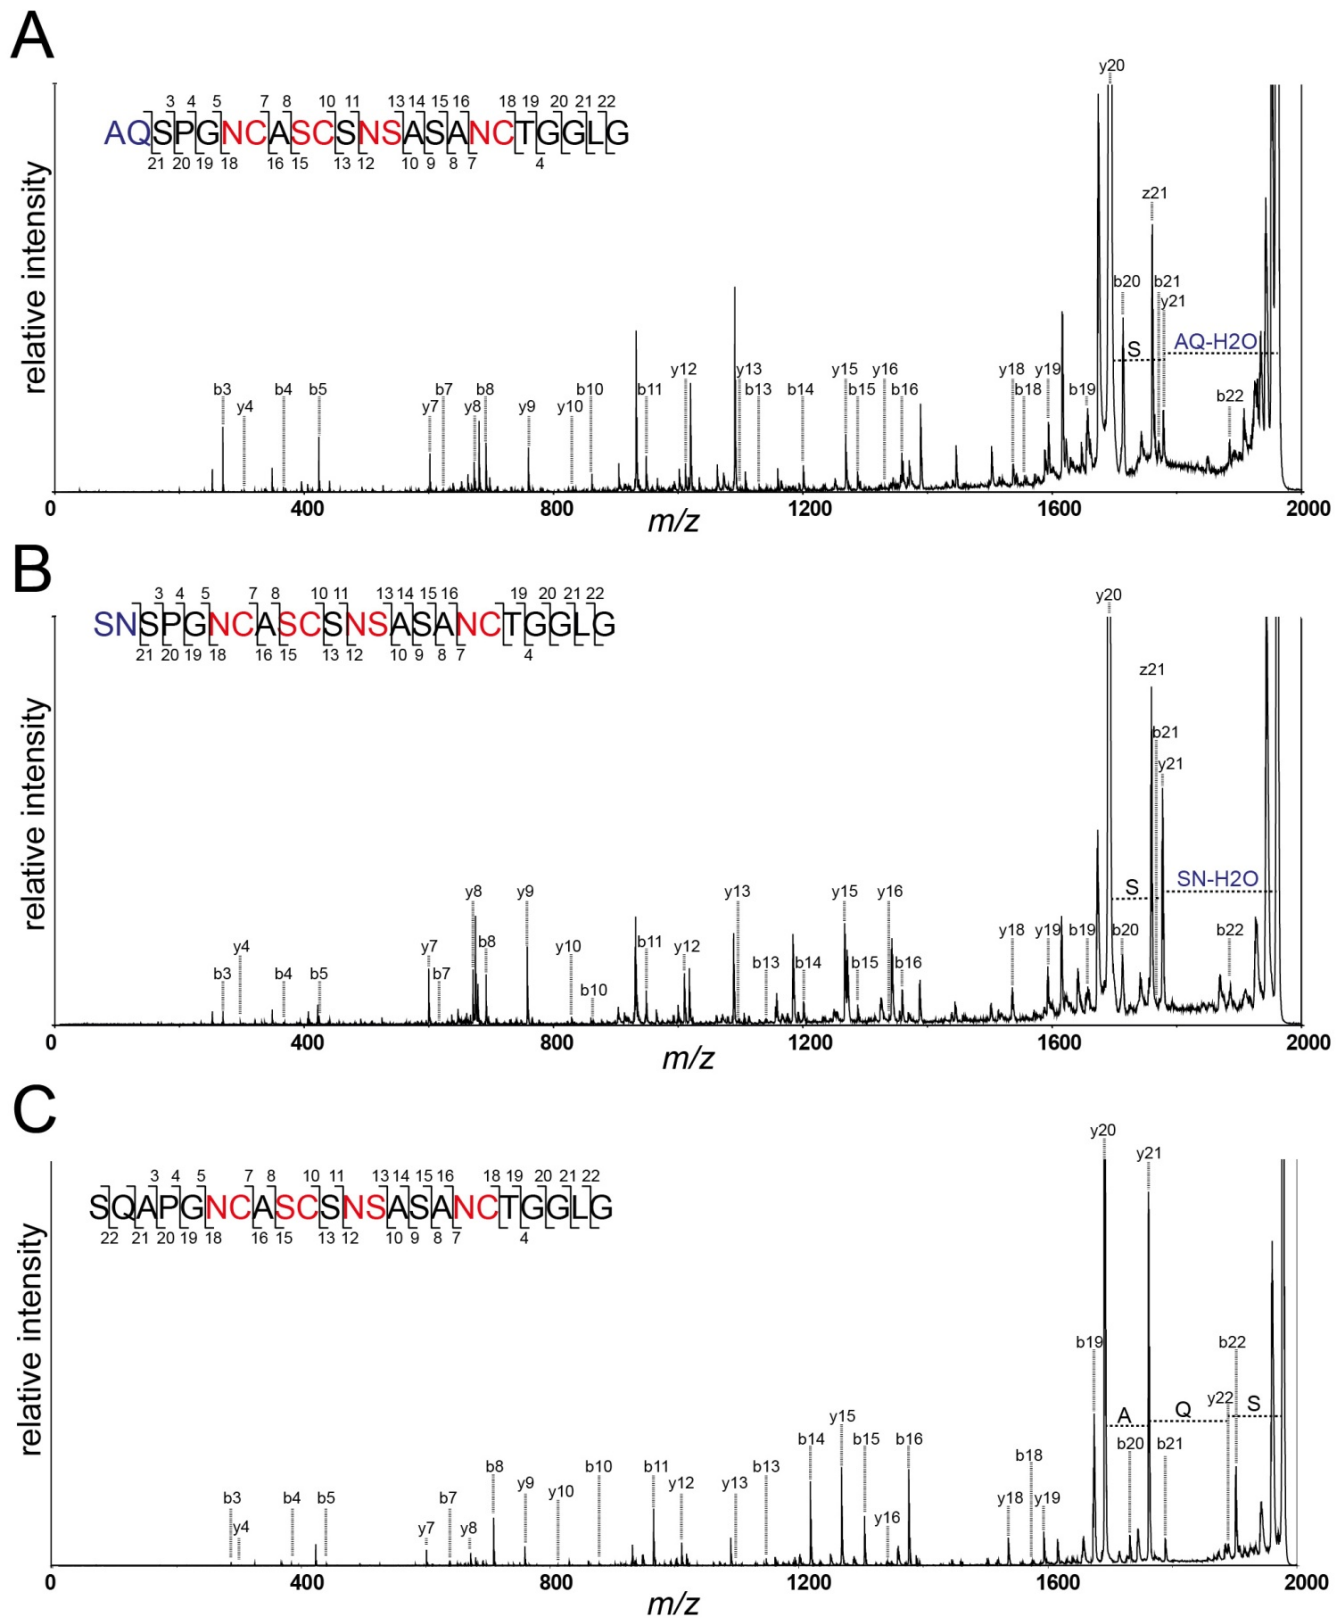

**Supplementary Figure 9 | MS/MS fragmentation spectrum of KLB<sup>S1A</sup>, KLB<sup>Q2N</sup>, and KLB<sup>S3A</sup>. (a) An *m/z* scan of purified KLB<sup>S1A</sup> derivative resulted in ion consistent with the calculated *m/z* of for KLB<sup>S3A</sup>**

with amidine ring (observed  $[M+H]^+$  at  $m/z$  1958.6929, calculated  $[M+H]^+$  1958.6968,  $\Delta\text{ppm}=1.99$ ). The ion was fragmented and produced represented spectra. The diagram of  $\text{KLB}^{\text{S1A}}$  with the observed  $b$ - and  $y$ -ions labeled in the structure and in the spectra. **(b)** An  $m/z$  scan of purified  $\text{KLB}^{\text{Q2N}}$  derivative resulted in ion consistent with the calculated  $m/z$  of for  $\text{KLB}^{\text{Q2N}}$  with amidine ring (observed  $[M+H]^+$  at  $m/z$  1960.6693, calculated  $[M+H]^+$  1960.6761,  $\Delta\text{ppm}=3.47$ ). The ion was fragmented and produced represented spectra. The diagram of  $\text{KLB}^{\text{Q2N}}$  with the observed  $b$ - and  $y$ -ions labeled in the structure and in the spectra. **(c)** An  $m/z$  scan of purified  $\text{KLB}^{\text{S3A}}$  derivative resulted in ion consistent with the calculated  $m/z$  of for  $\text{KLB}^{\text{S3A}}$  that doesn't contain an amidine ring (observed  $[M+H]^+$  at  $m/z$  1976.7048, calculated  $[M+H]^+$  1976.7074,  $\Delta\text{ppm}=1.32$ ). The ion was fragmented and produced represented spectra. The diagram of  $\text{KLB}^{\text{S3A}}$  with the observed  $b$ - and  $y$ -ions labeled in the structure and in the spectra. Presence of  $y_{22}$ -ion and no loss of  $\text{H}_2\text{O}$  molecule support the absence of amidine ring.

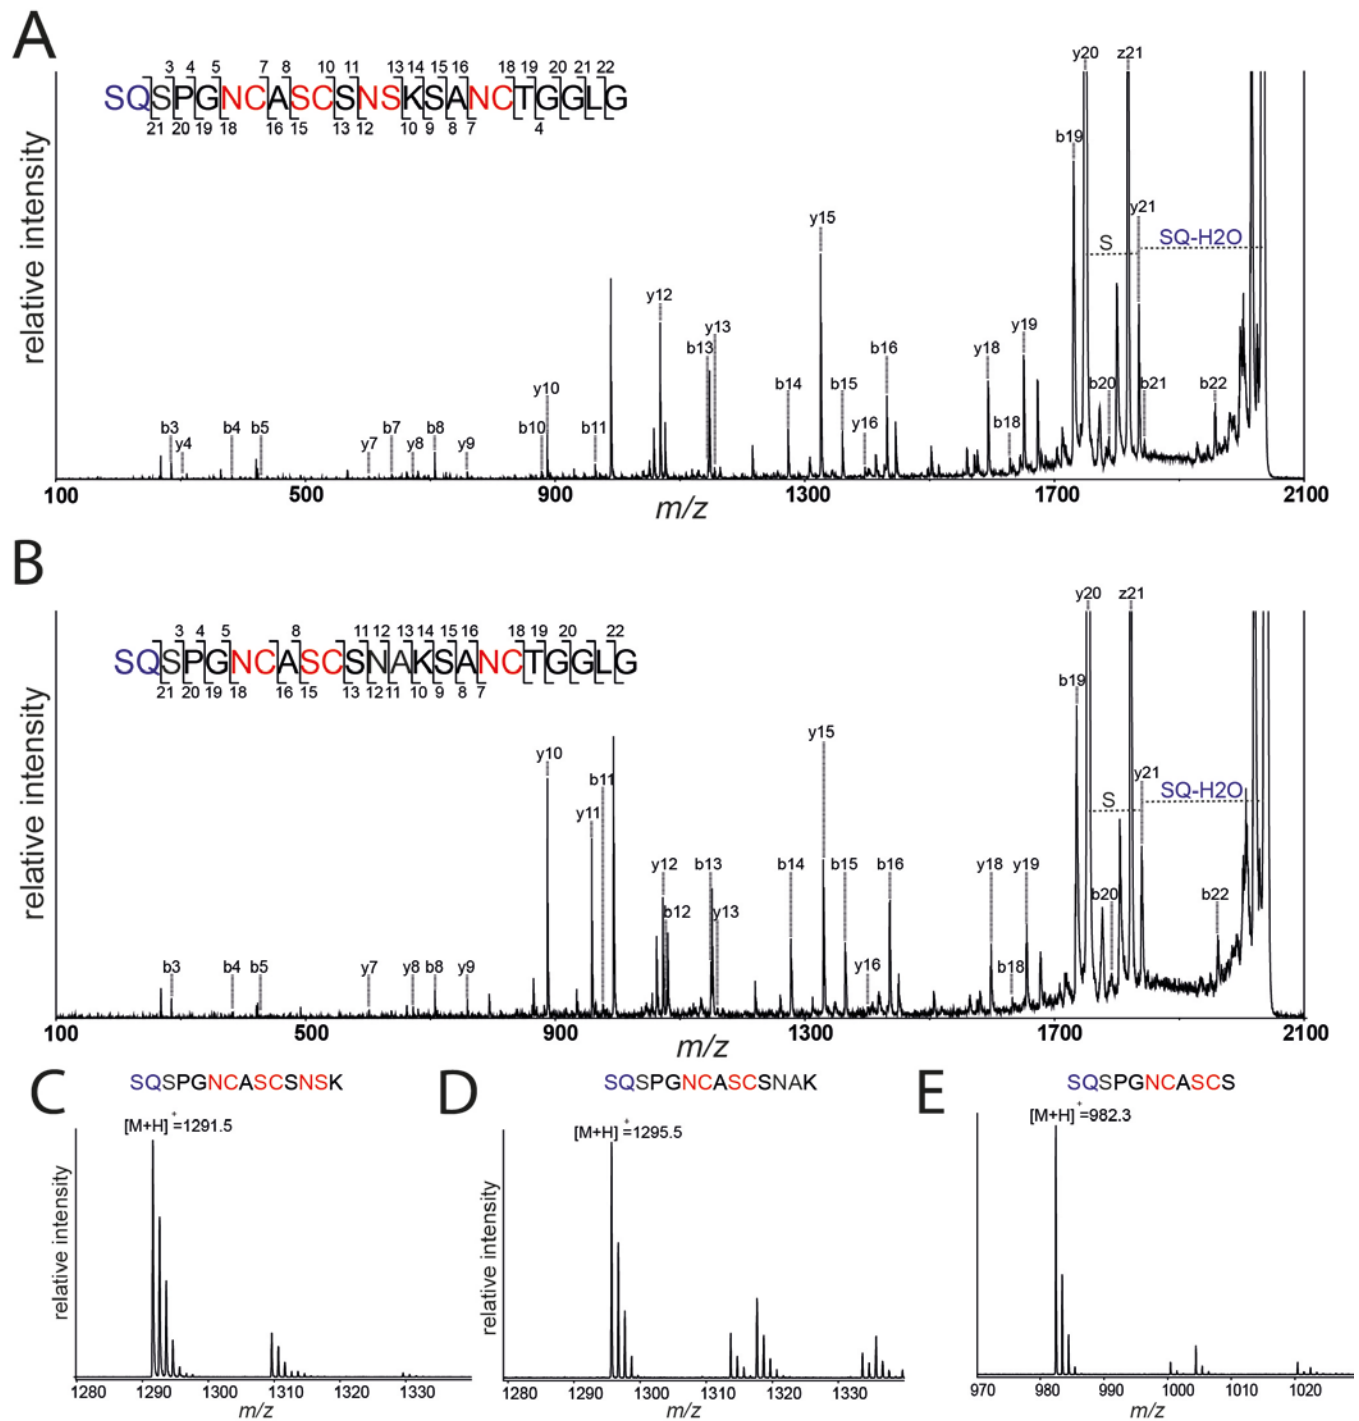

**Supplementary Figure 10 | MS/MS fragmentation spectrum of KLB<sup>A14K</sup> and KLB<sup>S13A-A14K</sup>.** An *m/z* scan of purified KLB<sup>A14K</sup> (a) and KLB<sup>S13A-A14K</sup> (b) mutants resulted in ion consistent with the calculated *m/z* for derivatives with amidine ring. The ions were fragmented and produced represented spectra. Diagrams with the observed *b*- and *y*-ions labeled in the structure and in the spectra. (c) MALDI-TOF-MS spectra of HPLC purified KLB<sup>A14K</sup>(1-14) fragment, product of proteolysis of KLB<sup>A14K</sup> by trypsin. (d)

MALDI-TOF-MS spectra of HPLC purified KLB<sup>S13A-A14K</sup> (1-14) fragment, product of proteolysis of KLB<sup>S13A-A14K</sup> by trypsin. (e) MALDI-TOF-MS spectra of HPLC purified KLB<sup>S13A-A14K</sup>(1-14) fragment, product of proteolysis of KLB<sup>S13A-A14K</sup>(1-14) by carboxypeptidase Y.

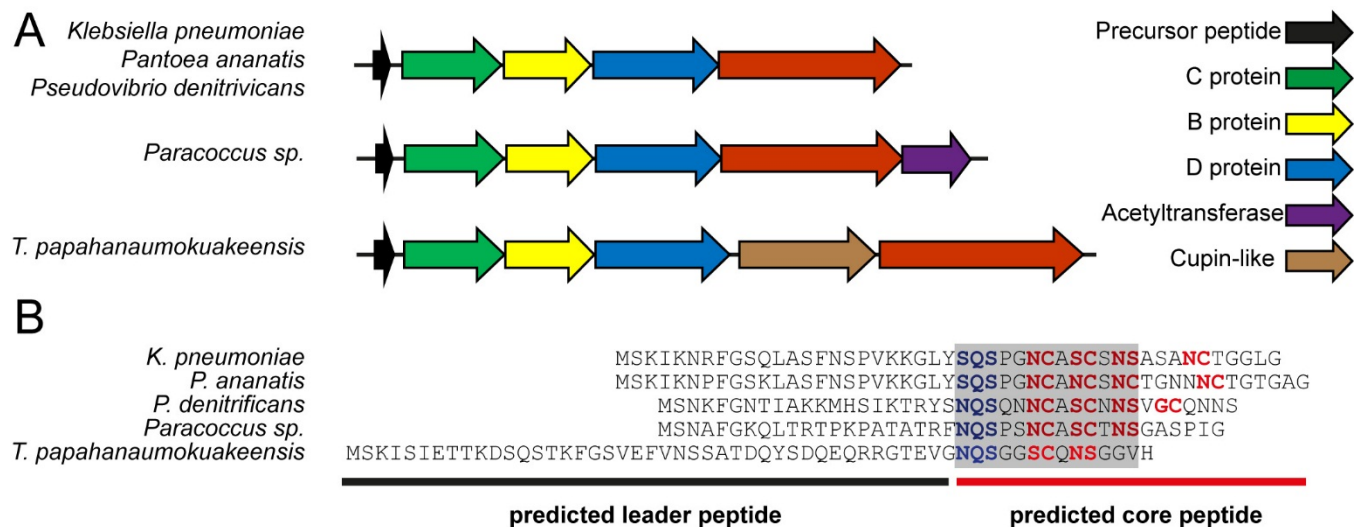

**Supplementary Figure 11 | Biosynthetic gene clusters similar to klebsazolicin.** (a) Schematic representation of gene clusters from *Pantoea ananatis* strain PA4 (JMJK01000000), *Pseudovibrio denitrificans* JCM 12308 (BAZK01000000), *Paracoccus sp.* 228 (JYGY01000000) and *Paracoccus sp.* S4493 (JXYF01000000), and *Terasakiispira papahanaumokuakeensis* strain PH27A (MDTQ01000000) similar to *klpABCDE* gene cluster. (b) Alignment of predicted precursor peptides. Predicted residues involved in formation of the amidine ring and azoles are labelled in blue and red, respectively. Conservative part is highlighted by grey rectangle.

## **II. SUPPLEMENTARY MOVIE**

**Supplementary Movie 1 | KLB functional site in the 70S ribosome.** The movie shows: (1) zoom-out and (2) close-up views of the KLB binding site in the large subunit of the *T. thermophilus* 70S ribosome programmed with mRNA and three tRNAs; (3) details of KLB interactions with the 23S rRNA in the PTC of the ribosome; (4) occlusion of the nascent peptide exit tunnel by KLB molecule.

### III. SUPPLEMENTARY DATASETS

#### **Supplementary Dataset 1 | Raw data for the luciferase luminescence assay shown in Figure 2b.**

Inhibition of protein synthesis by increasing concentrations of KLB in the *in vitro* cell-free translation in S30 extract. Efficiency of protein synthesis is measured in arbitrary luciferase luminescence units. Data for three independent measurements at each given concentration of KLB are shown. Each data point on the plot represents the average of three independent measurements. Standard deviations for each data point are calculated, however, the error-bars are not shown on the plot due to their small size.





**Supplementary Table 2 | Klebsazolicin MICs for various *E. coli* rRNA mutant strains.**

| Strain (mutation)                                                     | MIC, µg/ml | MIC, µM | Fold change |
|-----------------------------------------------------------------------|------------|---------|-------------|
| SQ110DTC <sup>a</sup> (pBAD- <i>sbmA-ompF</i> )                       | 64         | 32      | 1           |
| SQ110DTC (pBAD- <i>sbmA-ompF</i> ) ( <i>rrsX</i> U2609G) <sup>b</sup> | 256        | 130     | 4           |
| SQ110DTC (pBAD- <i>sbmA-ompF</i> ) ( <i>rrsX</i> U2609A) <sup>b</sup> | 256        | 130     | 4           |
|                                                                       |            |         |             |
| SQ171DTC <sup>c</sup>                                                 | 128        | 65      | 1           |
| SQ171DTC ( <i>rrsX</i> A2058G) <sup>d</sup>                           | 512        | 259     | 4           |
| SQ171DTC ( <i>rrsX</i> A2058U) <sup>d</sup>                           | 512        | 259     | 4           |
| SQ171DTC ( <i>rrsX</i> A2059C) <sup>d</sup>                           | 512        | 259     | 4           |
| SQ171DTC ( <i>rrsX</i> A2059G) <sup>d</sup>                           | 1024       | 519     | 8           |
| SQ171DTC ( <i>rrsX</i> A2059U) <sup>d</sup>                           | 256        | 130     | 2           |
| SQ171DTC ( <i>rrsX</i> U2584C) <sup>d</sup>                           | 1024       | 519     | 8           |
| SQ171DTC ( <i>rrsX</i> U2609A) <sup>d</sup>                           | 512        | 259     | 4           |
| SQ171DTC ( <i>rrsX</i> U2609C) <sup>d</sup>                           | 128        | 65      | 1           |
| SQ171DTC ( <i>rrsX</i> U2609G) <sup>d</sup>                           | 1024       | 519     | 8           |

<sup>a</sup> MG1655  $\Delta tolC$ ,  $\Delta(rrnA, rrnB, rrnC, rrnD, rrnG, rrnH)$

<sup>b</sup> Spontaneous resistance mutations

<sup>c</sup> MG1655  $\Delta tolC$ ,  $\Delta(rrnA, rrnB, rrnC, rrnD, rrnE, rrnG, rrnH)$ , pAM552

<sup>d</sup> Engineered resistance mutations

**Supplementary Table 3 | Nucleotide sequences of primers used for cloning and Sanger sequencing verification.**

| Name         | Primer (5'-3')                                                                                              | Purpose                                                            |
|--------------|-------------------------------------------------------------------------------------------------------------|--------------------------------------------------------------------|
| klpcF        | ATTATGAGCTCAAATAACATTTATAAGGCCGCAG                                                                          | Molecular cloning of <i>klpBCDE</i>                                |
| klpeR        | ATTATCTGCAGCTTAAAAATTATTTAATTCCATTACAACAT                                                                   |                                                                    |
| klpaF        | ATAATCCATGGCTAAAATCAAGAATCGTTTTGG                                                                           | Molecular cloning of <i>klpA</i>                                   |
| klpaR        | ATTATCTCGAGTTAACCTAAGCCACCTGTACAATTA                                                                        |                                                                    |
| klpaR2       | ATTATGAGCTCTTAACCTAAGCCACCTGTACAATTA                                                                        | Molecular cloning of <i>klpA2</i>                                  |
| klpaS3A      | ATTATCTCGAGTTAACCTAAGCCACCTGTACAATTAGCACTGGCACT<br>ATTTGAACAACCTTGCACAATTACCCGGTGCCTGACTATAGAGTCCCT<br>TCTT | Molecular cloning for preparation of KlpA Ser3Ala mutant           |
| klpaQ2N      | ATTATCTCGAGTTAACCTAAGCCACCTGTACAATTAGCACTGGCACT<br>ATTTGAACAACCTTGCACAATTACCCGGTGCCTGACTATAGAGTCCCT<br>TCTT | Molecular cloning for preparation of KlpA Gln2Asn mutant           |
| klpaS1A      | ATTATCTCGAGTTAACCTAAGCCACCTGTACAATTAGCACTGGCACT<br>ATTTGAACAACCTTGCACAATTACCCGGTGCCTGACTATAGAGTCCCT<br>TCTT | Molecular cloning for preparation of KlpA Ser1Ala mutant           |
| klpaA14K     | ATTATCTCGAGTTAACCTAAGCCACCTGTACAATTAGCACTTTTACT<br>ATTTGAACAACCTTGCACAA                                     | Molecular cloning for preparation of KlpA Ala14Lys mutant          |
| klpaA11K     | ATTATCTCGAGTTAACCTAAGCCACCTGTACAATTAGCACTGGCACT<br>ATTTTTACAACCTTGCACAATTACCCG                              | Molecular cloning for preparation of KlpA Ala11Lys mutant          |
| klpaS13AA14K | ATTATCTCGAGTTAACCTAAGCCACCTGTACAATTAGCACTTTTCGC<br>ATTTGAACAACCTTGCACAATT                                   | Molecular cloning for preparation of KlpA Ser13Ala-Ala11Lys mutant |
| sbmaF        | ATTAACCATGGTTAAGTCTTTTTTCCCAAAG                                                                             | Molecular cloning of <i>sbmA</i>                                   |
| sbmaR        | TAATTGGATCCTTAGCTCAAGGTATGGGTTACTTC                                                                         |                                                                    |
| ompfF        | TAATTCATATGATGAAGCGCAATATTCTGGC                                                                             | Molecular cloning of <i>ompF</i>                                   |
| ompfR        | TAATTCCTCGAGTTAGAACTGGTAAACGATACCCAC                                                                        |                                                                    |
| klpeF        | ATTATCCATGGAAAAGATTCTATACATTGCATC                                                                           | Molecular cloning of <i>klpE</i>                                   |
| klpeR2       | ATTATGAGCTCCTTAAAAATTATTTAATTCCATTACAACAT                                                                   |                                                                    |
| rrnE1        | GGATTTGACTATTACAGAG                                                                                         | Sequencing of <i>rrnE</i> gene                                     |
| rrnE2        | AAATTGAAGAGTTTGATCATG                                                                                       |                                                                    |
| rrnE3        | CTGTCGTCAGCTCGTGTTGTG                                                                                       |                                                                    |
| rrnE4r       | AATGGCGCATACAAAGAGAAGC                                                                                      |                                                                    |
| rrnE5        | GGTTAAGCGACTAAGCGTAC                                                                                        |                                                                    |
| rrnE6        | CGGCGGGTGCTAACGTCCGTGC                                                                                      |                                                                    |
| rrnE7        | GCGAAATTCCTTGTCGGGTAA                                                                                       |                                                                    |
| rrnE8r       | GGATAGGTGGGAGGCTTTGAAGT                                                                                     |                                                                    |
| rrnE9        | AGCTGGGTTTAGAACGTCGTG                                                                                       |                                                                    |
| rrnE10       | GGTTAAGCGACTAAGCGTAC                                                                                        |                                                                    |
| rrnE11       | CACTAACTGGAGGACCGAAC                                                                                        |                                                                    |
| rrnE12r      | GCGAAATTCCTTGTCGGGTAA                                                                                       |                                                                    |
| rrnE13       | GGATAGGTGGGAGGCTTTGAAGT                                                                                     |                                                                    |
| rrnE14r      | CCTTACAACGCCGAAGGTGTTT                                                                                      |                                                                    |
| U2584C-1     | CTTAGAACGTCGTGAGACA                                                                                         | Site mutagenesis of pAM552 plasmid at position U2584               |
| U2584C-2     | CCAGCTCGCGTACCACTT                                                                                          |                                                                    |

**Supplementary Table 4 | Data collection and refinement statistics.**

| <b>70S-KLB with<br/>A-, P- and E-tRNAs</b>          |                                               |
|-----------------------------------------------------|-----------------------------------------------|
| <b>Data collection</b>                              |                                               |
| Space group                                         | P2 <sub>1</sub> 2 <sub>1</sub> 2 <sub>1</sub> |
| Cell dimensions                                     |                                               |
| <i>a</i> , <i>b</i> , <i>c</i> (Å)                  | 209.64, 449.06, 622.01                        |
| $\alpha$ , $\beta$ , $\gamma$ (°)                   | 90.0, 90.0, 90.0                              |
| Resolution (Å)                                      | 364-2.70 (2.77-2.70) <sup>a</sup>             |
| <i>R</i> <sub>merge</sub>                           | 15.9 (137.7)                                  |
| <i>I</i> / $\sigma$ <i>I</i>                        | 9.20 (0.97) <sup>b</sup>                      |
| Completeness (%)                                    | 99.3 (93.0)                                   |
| Redundancy                                          | 4.97 (3.60)                                   |
| <b>Refinement</b>                                   |                                               |
| Resolution (Å)                                      | 2.70                                          |
| No. reflections                                     | 1,572,843                                     |
| <i>R</i> <sub>work</sub> / <i>R</i> <sub>free</sub> | 20.7/25.2                                     |
| No. atoms                                           |                                               |
| Protein                                             | 90,976                                        |
| Ligand/ion                                          | 203,179                                       |
| Water                                               | 5,861                                         |
| <i>B</i> factors                                    |                                               |
| Protein                                             | 55.5                                          |
| Ligand/ion                                          | 52.5                                          |
| Water                                               | 40.5                                          |
| r.m.s. deviations                                   |                                               |
| Bond lengths (Å)                                    | 0.005                                         |
| Bond angles (°)                                     | 0.888                                         |

Values in parentheses are for highest-resolution shell.

<sup>a</sup> Single crystal was used to obtain the structure

<sup>b</sup> *I*/ $\sigma$ *I* = 2 at 2.87Å resolution

**V. SUPPLEMENTARY REFERENCES**

1. Polikanov, Y.S., Steitz, T.A. & Innis, C.A. A proton wire to couple aminoacyl-tRNA accommodation and peptide-bond formation on the ribosome. *Nat. Struct. Mol. Biol.* **21**, 787-793 (2014).
2. Bulkley, D., Innis, C.A., Blaha, G. & Steitz, T.A. Revisiting the structures of several antibiotics bound to the bacterial ribosome. *Proc. Natl. Acad. Sci. USA* **107**, 17158-17163 (2010).
3. Noeske, J. et al. Synergy of streptogramin antibiotics occurs independently of their effects on translation. *Antimicrob. Agents. Chemother.* **58**, 5269-5279 (2014).
4. Gagnon, M.G. et al. Structures of proline-rich peptides bound to the ribosome reveal a common mechanism of protein synthesis inhibition. *Nucleic Acids Research* **44**, 2439-2450 (2016).
5. Roy, R.N., Lomakin, I.B., Gagnon, M.G. & Steitz, T.A. The mechanism of inhibition of protein synthesis by the proline-rich peptide oncocin. *Nat. Struct. Mol. Biol.* **22**, 466-469 (2015).
